# Supplementary material for: Synthesis of stable gold nanoparticles using linear polyethyleneimines and catalysis of both anionic and cationic azo dye degradation
Source: Royal Society of Chemistry journal article supplement (doi:10.1039/d0ma00404a), 2020-01-01
Supplement: d0ma00404a1.pdf [file d0ma00404a1.pdf]

## Supporting information

# Synthesis of stable gold nanoparticles using linear polyethyleneimines and catalysis of both anionic and cationic azo dye degradation

Ozge Cavuslar,<sup>a</sup> Emre Nakay,<sup>b</sup> Umut Kazakoglu,<sup>b</sup> Sirous Khabbaz

Abkenar,<sup>c</sup> Clewa W. Ow-Yang,<sup>c,d</sup> and Havva Yagci Acara,<sup>b\*</sup> <sup>a,b,c</sup>

<sup>a</sup>Koc University, Graduate School of Materials Science and Engineering, Rumelifeneri Yolu, Sariyer 34450, Istanbul, Turkey; E-mail: fyagci@ku.edu.tr

<sup>b</sup>Koc University, Department of Chemistry, Rumelifeneri Yolu, Sariyer 34450, Istanbul, Turkey.

<sup>c</sup>Sabanci University, Material Science and Nano Engineering Program, Orta Mah. Universite Cad. No:27, Tuzla, Istanbul 34956, Turkey

<sup>d</sup>Sabanci University, Nanotechnology Research Center (SUNUM), Orta Mah. Universite Cad. No: 27, Tuzla, Istanbul 34956, Turkey

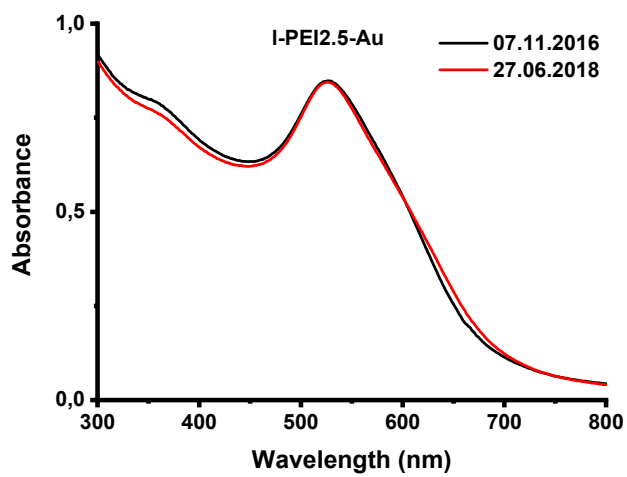

**Fig. S1** Absorbance spectra of fresh IPEI2.5-Au and 19 months after the synthesis.
